# Supplementary material for: Cross-linked polymer-derived B/N co-doped carbon materials with selective capture of CO2
Source: Royal Society of Chemistry journal article supplement (doi:10.1039/c5ta06702b), 2015-01-01
Supplement: c5ta06702b1.pdf [file c5ta06702b1.pdf]

## Supplementary Information

### The Cross-Linked Polymer-Derived B/N co-Doped Carbon Materials with Selective Capture of CO<sub>2</sub>

Wuxue Zhao,<sup>a</sup> Sheng Han,<sup>b</sup> Xiaodong Zhuang,<sup>\*a</sup> Fan Zhang,<sup>\*a</sup> Yiyong Mai<sup>a</sup> and  
Xinliang Feng<sup>ac</sup>

<sup>a</sup>School of Chemistry and Chemical Engineering, Shanghai Jiao Tong University,  
Shanghai 200240, China

<sup>b</sup>School of Chemical and Environmental Engineering, Shanghai Institute of  
Technology, Haiquan Road 100, 201418, Shanghai, P. R. China

<sup>c</sup>Center for Advancing Electronics Dresden & Department of Chemistry and Food  
Chemistry, Technische Universitaet Dresden, 01062 Dresden, Germany

E-mail address: fan-zhang@sjtu.edu.cn; zhuang@sjtu.edu.cn.

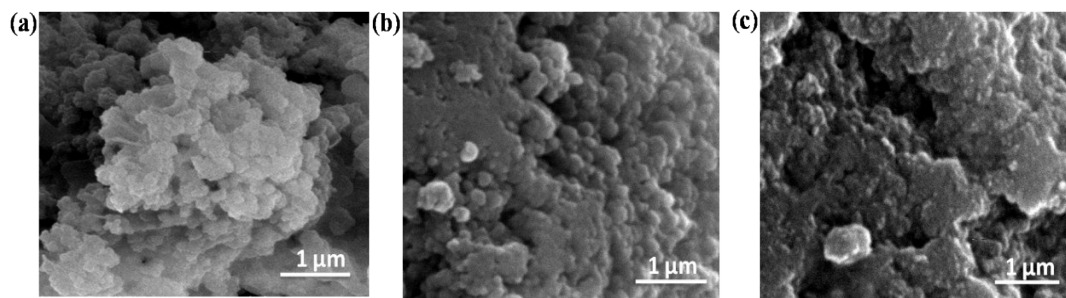

**Figure. S1** SEM images of (a) PPs-BN-1, (b) PPs-BN-2 and (c) PPs-BN-3. The samples are homogeneous, composing of loose agglomerates of tiny particles with rough surface and irregular shape.

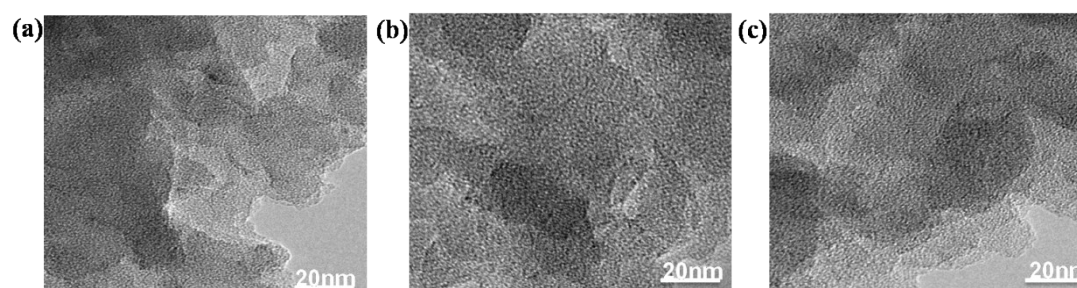

**Figure. S2** TEM images of (a) PPs-BN-1, (b) PPs-BN-2 and (c) PPs-BN-3. The TEM images for both networks showed typical irregular structures as usually found for porous polymers.

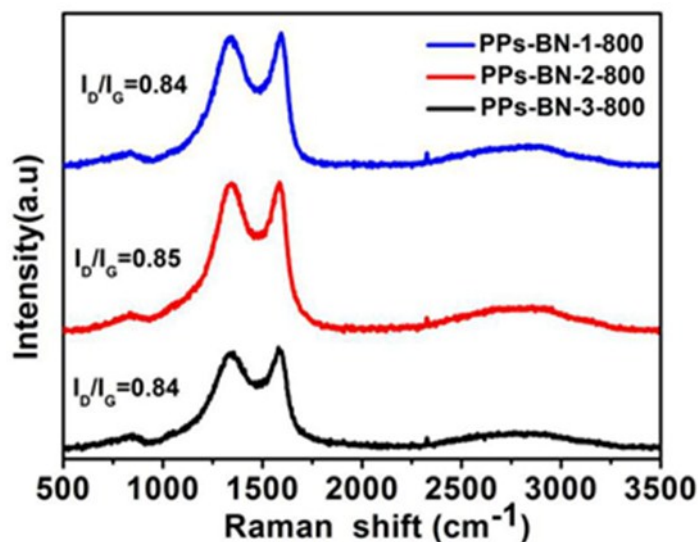

**Figure. S3** Raman spectra of PPs-BN-i-800 ( $i=1, 2, 3$ ).

Raman spectroscopy has been widely used to characterize the structure of carbon materials. The Raman spectra of PPs-BN-i-800 ( $i=1, 2, 3$ ) were shown in Figure S3.

There are two prominent peaks at 1338.4 and 1593.5  $\text{cm}^{-1}$ , corresponding to the D and G bands, respectively. The ID/IG ratio of PPs-BN-*i*-800 (*i*=1, 2, 3) (0.84-0.85) indicates that the presence of a certain graphitization degree for carbon materials after pyrolysis at 800 °C.

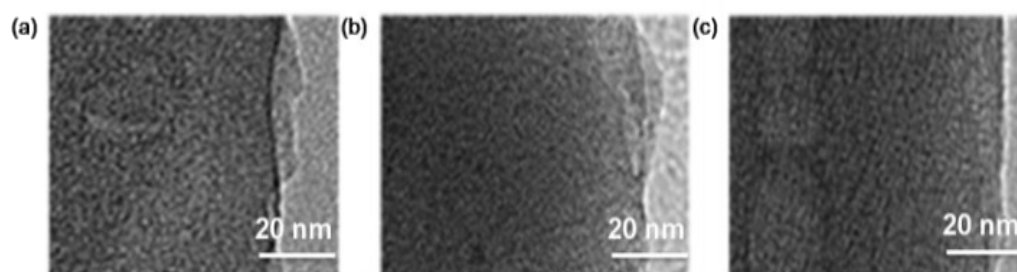

**Figure. S4** TEM images of (a) PPs-BN-1-800. (b) PPs-BN-2-800 and (c) PPs-BN-3-800.

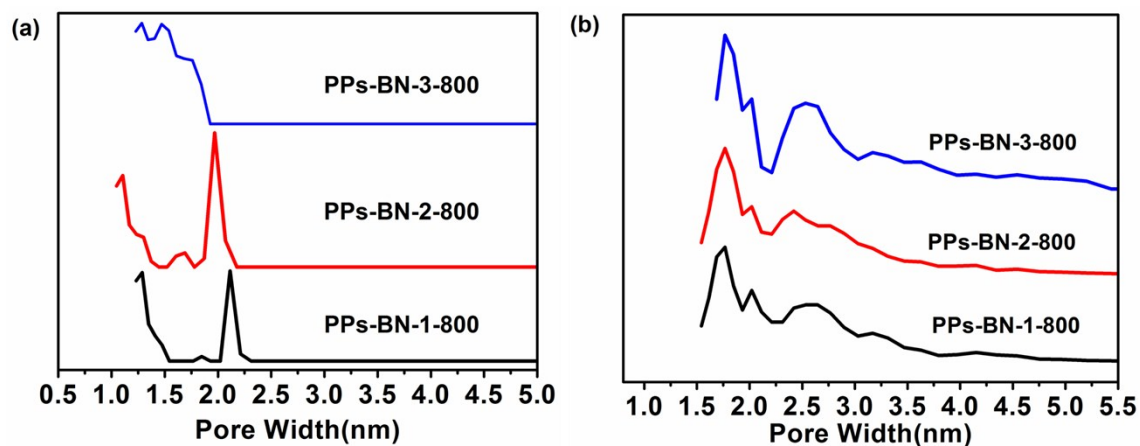

**Figure. S5** Pore size distribution curves for PPs-BN-*i*-800 as calculated by NL-DFT from (a) N<sub>2</sub> (77 K) and (b) CO<sub>2</sub> (273 K) adsorption isotherms.

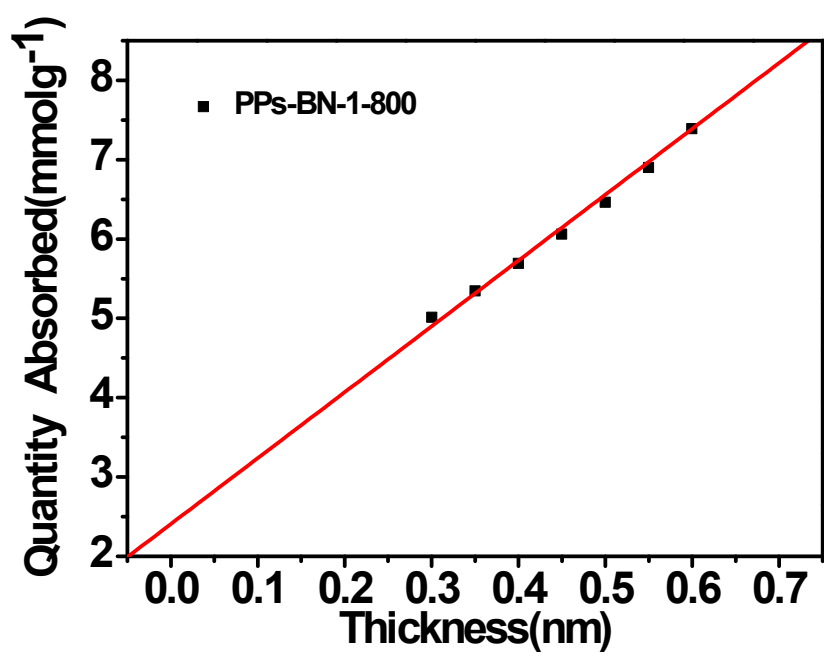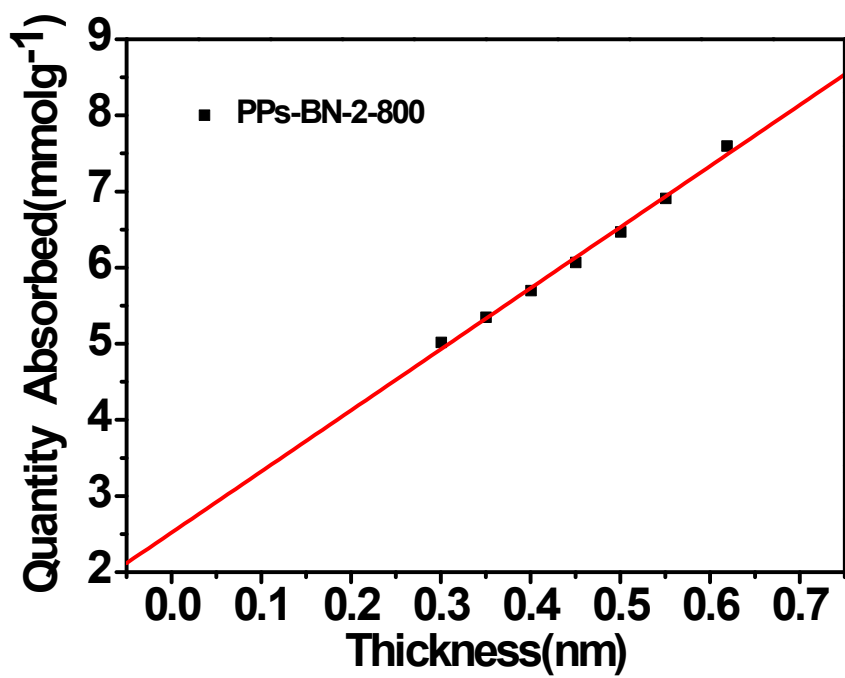

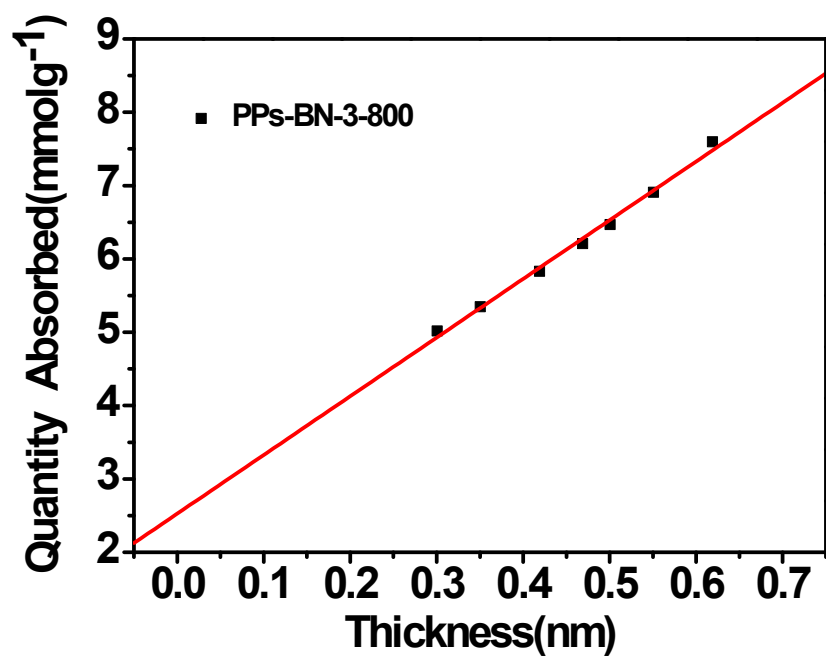

Figure. S6 BET specific surface area plot of PPs-BN-i-800 (i=1, 2, 3).

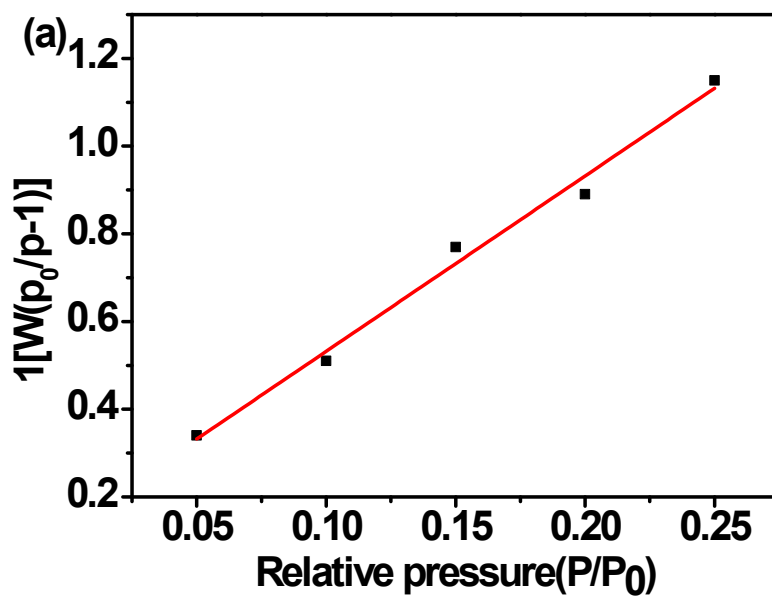

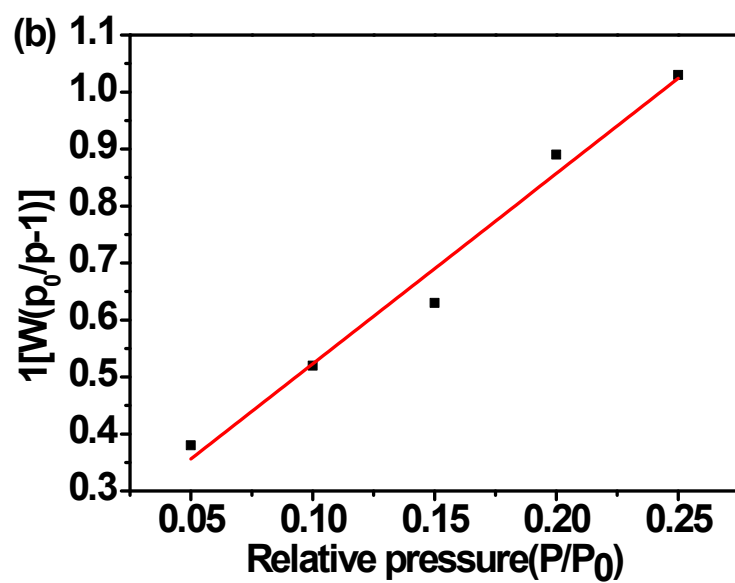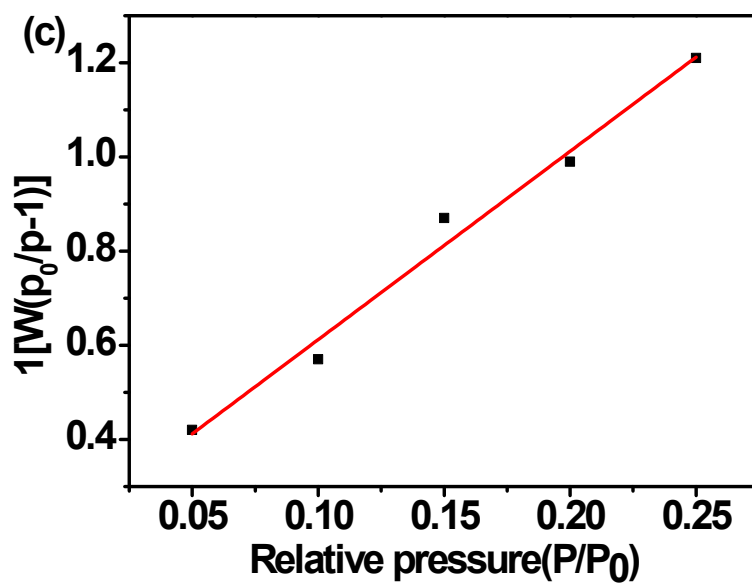

**Figure. S7** The curve of the BET linear correlation (a) PPs-BN-1, (b) PPs-BN-2 and (c) PPs-BN-3.

**Table S1.** Physical properties for polymer networks and porous carbon and comparison of CO<sub>2</sub> uptake for various porous carbon at 273 K or 298 K and 1 bar.

| Sample              | N <sup>a</sup><br>[wt%] | S <sub>BET</sub> <sup>b</sup><br>[m <sup>2</sup> g <sup>-1</sup> ] | CO <sub>2</sub> uptake<br>[mmol g <sup>-1</sup> ] |       | CH <sub>4</sub> uptake<br>[mmol g <sup>-1</sup> ] |       | Ref              |
|---------------------|-------------------------|--------------------------------------------------------------------|---------------------------------------------------|-------|---------------------------------------------------|-------|------------------|
|                     |                         |                                                                    | 273 K                                             | 298 K | 273 K                                             | 298 K |                  |
|                     |                         |                                                                    |                                                   |       |                                                   |       |                  |
| <b>PPs-BN-1-800</b> | 5.63                    | 215                                                                | 3.23                                              | 2.31  | 0.98                                              | 0.46  |                  |
| <b>PPs-BN-2-800</b> | 5.72                    | 291                                                                | 3.25                                              | 2.40  | 1.10                                              | 0.59  | This work        |
| <b>PPs-BN-3-800</b> | 4.89                    | 268                                                                | 3.11                                              | 2.34  | 1.15                                              | 0.54  |                  |
| MFB-600             | 1.74                    | 490                                                                | -                                                 | 2.25  |                                                   |       | Ref <sup>1</sup> |
| NC-800              | 3.0                     | 263                                                                | 2.65                                              | 1.95  |                                                   |       | Ref <sup>2</sup> |
| CP-4-800            | 0.47                    | 3450                                                               | -                                                 | 2.60  |                                                   |       | Ref <sup>3</sup> |
| 3C-650N             | 2.95                    | 741                                                                | -                                                 | 2.43  |                                                   |       | Ref <sup>4</sup> |
| C600                | 20.2                    | 362                                                                | -                                                 | 1.90  |                                                   |       | Ref <sup>5</sup> |
| AC-800-2            | /                       | 2994                                                               | -                                                 | 2.51  |                                                   |       | Ref <sup>6</sup> |
| FCDTPA-700          | 4.71                    | 417                                                                | 2.92                                              |       |                                                   |       | Ref <sup>7</sup> |

[a] Derived from XPS analysis, [b] Surface area calculated from the N<sub>2</sub> adsorption isotherm using the BET method.

**Table S2.** The peak position and percentage for each N peak of porous carbon from XPS.

| Sample       | -N-B- |      | pyridinic-N |      | -N-C- |      | pyrrolic-N |      | graphitic-N |      |
|--------------|-------|------|-------------|------|-------|------|------------|------|-------------|------|
|              | eV    | %    | eV          | %    | eV    | %    | eV         | %    | eV          | %    |
| PPs-BN-1-800 | 398.2 | 15.1 | 398.8       | 22.1 | 399.8 | 24.3 | 400.8      | 23.2 | 401.6       | 15.3 |
| PPs-BN-2-800 | 397.8 | 21.9 | 398.5       | 19.8 | 399.6 | 21.1 | 401.0      | 20.1 | 401.8       | 17.1 |
| PPs-BN-3-800 | 398.1 | 12.7 | 398.8       | 22.1 | 399.7 | 23.6 | 400.8      | 22.5 | 401.6       | 19.1 |

## Virial graph for the adsorption of CO<sub>2</sub> at different temperature

The Virial equation can be written in the following form:<sup>8</sup>

$$\ln(n/P) = A_0 + A_1 n + A_2 n^2 + A_3 n^3 + \dots$$

□□

Where n is the amount adsorbed at pressure p and the first Virial coefficient, A<sub>0</sub> is a constant related to the Henry's law constant. In the low pressure range, the higher terms (A<sub>2</sub>, A<sub>3</sub>... etc) in the Virial equation could be ignored at low surface coverage. As shown in the plots, the term ln(n/P) shows the nearly linear relationship with adsorption amounts (as shown in Fig. S7-9 for CO<sub>2</sub>). Therefore, the values of the first Virial coefficient (A<sub>0</sub>) and the second Virial coefficient (A<sub>1</sub>) which reflect the adsorbate-adsorbent interaction and adsorbate-adsorbate interactions, respectively, can be obtained from the linear fit of ln(n/P) versus n.



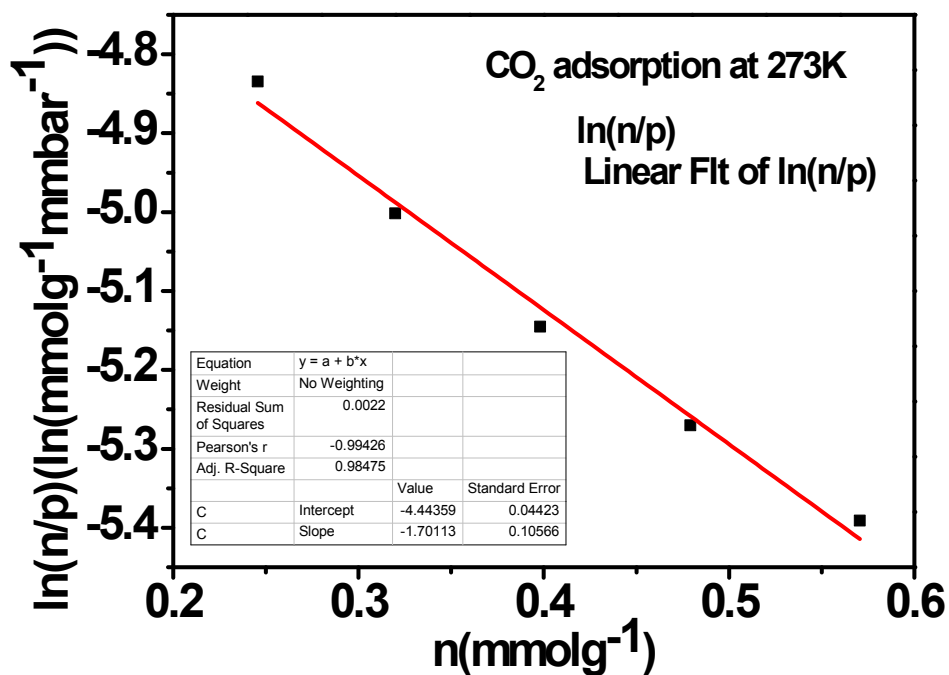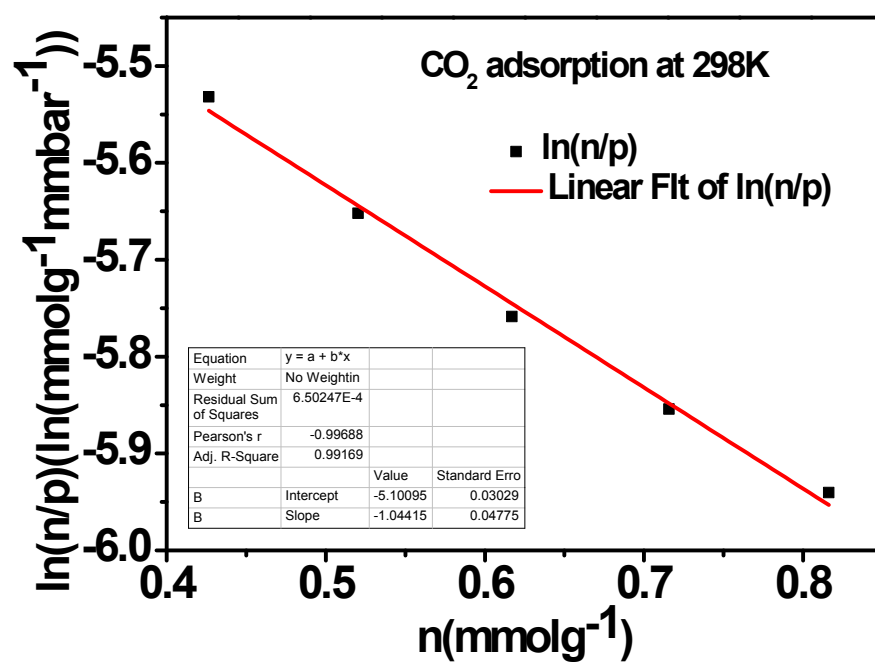

Figure. S8 Virial graph for the adsorption of CO<sub>2</sub> on PPs-BN-1-800 at 273 K and 298 K.

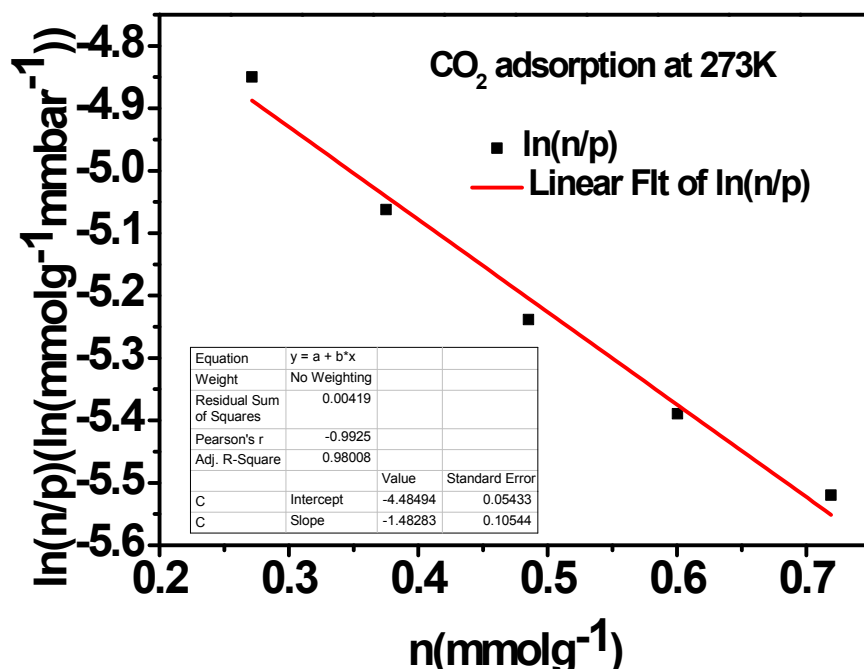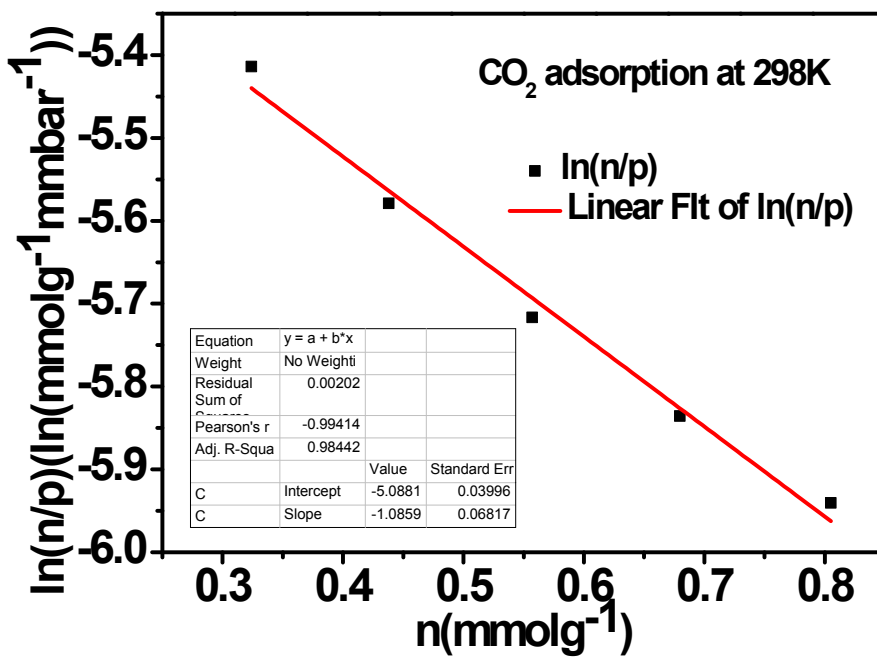

Figure. S9 Virial graph for the adsorption of CO<sub>2</sub> on PPs-BN-2-800 at 273 K and 298 K.

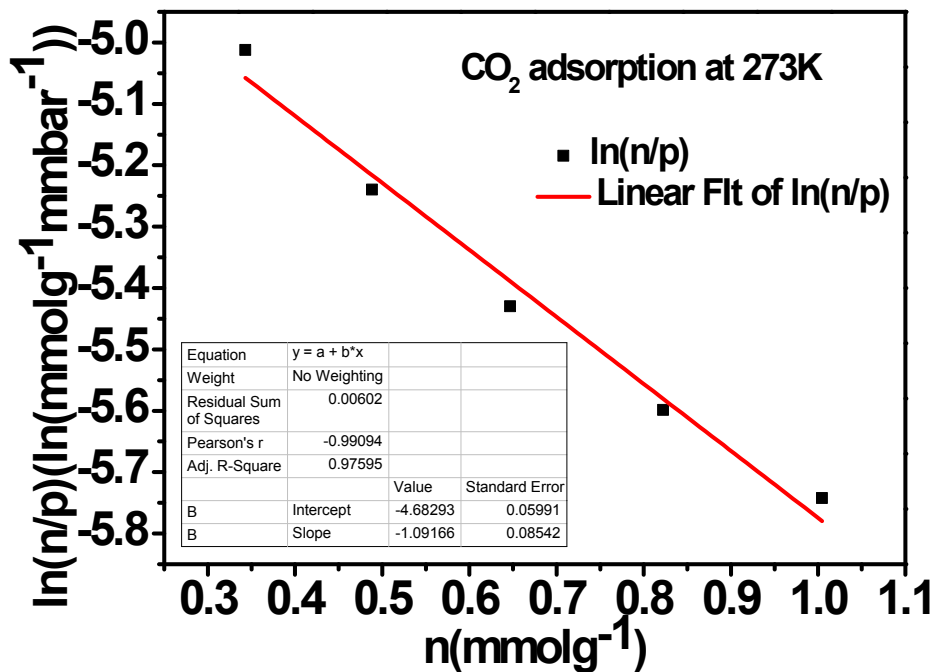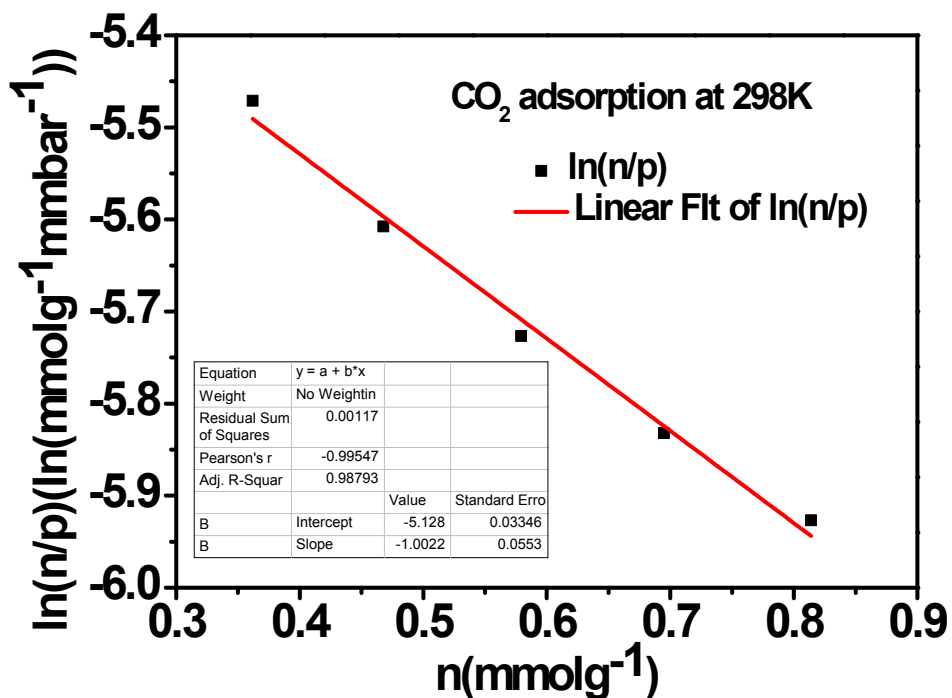

**Figure. S10** Virial graph for the adsorption of CO<sub>2</sub> on PPs-BN-3-800 at 273 K and 298 K.

## References

1. C. Pevida, T. C. Drage and C. E. Snape, *Carbon*, 2008, **46**, 1464.
2. M. Sevilla, J. B. Parra and A. B. Fuertes, *ACS appl.mater.inter.*, 2013, **5**, 6360.
3. M. Sevilla, P. Valle-Vigón and A. B. Fuertes, *Adv. Funct. Mater.*, 2011, **21**, 2781.
4. L. Liu, Q.-F. Deng, T.-Y. Ma, X.-Z. Lin, X.-X. Hou, Y.-P. Liu and Z.-Y. Yuan, *J. Mater. Chem.*, 2011, **21**, 16001.
5. F. Bai, Y. Xia, B. Chen, H. Su and Y. Zhu, *Carbon*, 2014, **79**, 213.
6. Z. Zhang, J. Zhou, W. Xing, Q. Xue, Z. Yan, S. Zhuo and S. Z. Qiao, *Phys. Chem. Chem. Phys.*, 2013, **15**, 2523.
7. X. Yang, M. Yu, Y. Zhao, C. Zhang, X. Wang and J.-X. Jiang, *J. Mater. Chem A.*, 2014, **2**, 15139.
8. H. Xu, Y. B. He, Z. J. Zhang, S. C. Xiang, J. F. Cai, Y. J. Cui, Y. Yang, G. D. Qian and B. L. Chen. *J. Mater. Chem A*, 2013,**1**, 77.
